# Supplementary material
Source: PubMed Central journal article supplement (PMC2853012)
Supplement: NIHMS189059-supplement-Supporting_Information.pdf [file NIHMS189059-supplement-Supporting_Information.pdf]

# High resolution structure of a $\beta$ -peptide bundle

Douglas S. Daniels<sup>†</sup>, E. James Petersson<sup>†</sup>, Jade X. Qiu<sup>†</sup> & Alanna Schepartz<sup>†‡\*</sup>

Departments of <sup>†</sup>Chemistry and <sup>‡</sup>Molecular, Cellular and Developmental Biology,

Yale University, New Haven, Connecticut 06520-8107 USA

**General Methods.** Fmoc-protected  $\alpha$ -amino acids, *O*-Benzotriazole-*N,N,N',N'*-tetramethyluronium-hexafluoro-phosphate (HBTU), *N*-Hydroxybenzotriazole (HOBt), and Wang resin were purchased from Novabiochem (San Diego, CA). Dimethylformamide (DMF), *N*-methyl-2-pyrrolidone (NMP), *N*-methyl morpholine (NMM), trifluoroacetic acid (TFA), and piperidine (Pip) were purchased from American Bioanalytical (Natick, MA). *N*-Fmoc- $\alpha$ -<sup>3</sup>-iodohomophenylalanine was purchased from Peptech (Burlington, MA). All other reagents were purchased from Sigma-Aldrich (St. Louis, MO). Mass spectra were acquired with an Applied Biosystems Voyager-DE Pro MALDI-TOF mass spectrometer (Foster City, CA). Reverse-phase HPLC was performed using a Varian Prostar HPLC and Vydac analytical (C8, 300 Å, 5  $\mu$ m, 4.6 mm x 150 mm) or preparative (C8, 300 Å, 5  $\mu$ m, 25 mm x 250 mm) columns, using water/acetonitrile gradients containing 0.1% TFA.  $\alpha$ -<sup>3</sup>-peptides were synthesized using a Symphony/Multiplex peptide synthesizer (Protein Technologies, Tuscon, AZ). CD spectra were acquired with a Jasco J-810 Spectropolarimeter (Jasco, Tokyo, Japan) equipped with a Peltier

temperature control. Analytical ultracentrifugation was performed using a Beckman XL-I instrument (Beckman, Fullerton, CA).

**®-peptide synthesis and purification.** ®-peptides were synthesized on a 25  $\mu$ mole scale using standard Fmoc chemistry and Wang resin loaded with ®<sup>3</sup>-homoaspartic acid as described.<sup>1</sup> One cycle of peptide elongation consisted of the following steps: First, the loaded resin was washed with DMF (6 X 30 sec) and the terminal Fmoc protecting group removed with 20% Pip in DMF (1 X 2 min, 2 X 8 min). This deprotection step was supplemented with a second deprotection step using diazabicyclo[5.4.0]undec-7-ene (DBU) after five residues had been attached to the resin (1 X 2 min 20% Pip/DMF, 2 X 8 min 20% Pip/DMF, 1 X 8 min 2:2:96 Pip/DBU/DMF, and 1 X 8 min 20% Pip/DMF). After deprotection, the resin was washed with DMF (6 X 30 sec) and the next ®<sup>3</sup>-amino acid coupling reaction was carried out for 30 min using 2 equiv. of the appropriate ®<sup>3</sup>-amino-acid, 1.8 equiv. HBTU, 2 equiv. HOBt, and 5 equiv. diisopropylethylamine (DIEA). This coupling was then repeated with fresh reagents for another 30 min. The resin was then washed with DMF (6 X 30 sec) before the next cycle of elongation. This elongation cycle was repeated until the ®-peptide sequence was complete. Once the final Fmoc protecting group had been removed, the resin was washed with DMF (8 X 30 sec) and methylene chloride (8 X 30 sec), dried for 20 min under nitrogen, and treated with a cleavage cocktail composed of 1% v/v each of water, triisopropylsilane and phenol in TFA (2 X 60 min). The cleaved peptides were precipitated with 50% v/v pentane/ether. After decantation and drying with nitrogen, the precipitated peptides were dissolved in 30% v/v acetonitrile in water and purified by HPLC.

The success of each synthesis was assessed first by HPLC and MALDI-TOF analysis of the crude reaction mixture. ®-peptides were then purified to homogeneity by reverse-phase HPLC.

The identities and purities of purified  $\text{R}^{\oplus}$ -peptides were assessed by analytical HPLC and mass spectrometry. MALDI mass spectra were obtained using peptide samples in  $\langle$ -cyano-4-hydroxycinnamic acid (CHCA) matrix. The masses found were: Zwit-1F (m/z observed, calculated): 1636, 1636; Zwit-1F\* (m/z observed, calculated): 1762, 1762. Following purification,  $\text{R}^{\oplus}$ -peptides were lyophilized and reconstituted in phosphate buffer (10 mM  $\text{NaH}_2\text{PO}_4$ , 200 mM NaCl, adjusted to pH 7.1 with NaOH) or PBC buffer (1 mM phosphoric, boric, and citric acids, adjusted to pH 7.0 with NaOH) for subsequent characterization.

**Circular Dichroism (CD).** Wavelength-dependent CD spectra were obtained in PBC buffer at 25 °C in continuous scan mode with a 1 nm data pitch, 50 nm/min scanning speed, 4 sec response, 1 nm band width, and 3 accumulations. Wavelength-dependent scans of various concentrations of Zwit-1F are shown in Figure 1 in the main text. Zwit-1F\* was observed to exhibit similar concentration-dependent increases in structure as monitored by changes in molar residue ellipticity (Figure SI-1). Temperature-dependent CD spectra were obtained at 205 nm, between 5 and 95 °C, using the variable temperature module provided with the instrument. Data were collected with a 1 °C data pitch, 5 s. delay time, 1 °C/min. temperature slope, 4 s. response time, and 1 nm band width. Figure 1 in the main text illustrates the change in the MRE at 205 nm for a 100  $\mu\text{M}$  sample of Zwit-1F.

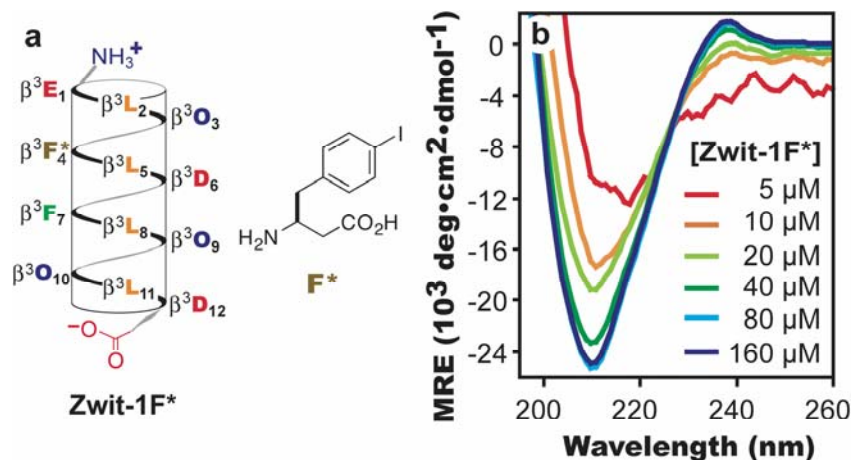

**Figure SI-1.** Zwit-1F\* and its self-association monitored by circular dichroism spectroscopy (CD). (a) Helical net representation of Zwit-1F\* and the structure of  $\beta^3$ -4-iodohomophenylalanine (F\*). (b) Wavelength-dependent CD spectra of Zwit-1F\* at the concentration shown at 25 °C in PBC buffer, pH 7.1.

**Sedimentation Equilibrium.** Samples analyzed using analytical ultracentrifugation were prepared by dissolving HPLC-purified and lyophilized  $\beta$ -peptides in PBC buffer at the desired concentrations (100  $\mu$ M, and 250  $\mu$ M). The samples were then centrifuged to equilibrium at 25 °C at three different speeds (42,000, 50,000, and 60,000 rpm) in an AN 60-Ti 4-hole rotor equipped with six-channel, carbon-epoxy composite centerpieces supplied by Beckman. Absorbance was monitored at 230 nm. Data were collected with a 0.001 cm step size, and successive scans were initiated at 3-hour intervals. Samples were judged to have reached equilibrium when no significant change in radial concentration was observed in 3 successive scans using the program Match within the Heteroanalysis software suite (available from the National Analytical Ultracentrifugation Facility website, <http://vm.uconn.edu/~wwwbiotc/uaf.html>). The partial specific volume of each  $\beta$ -peptide was calculated from the amino acid composition according to Durchschlag and Zipper.<sup>2</sup> The data were fit to a monomer-nmer equilibrium model using Heteroanalysis software. The results of a representative global fitting are: Fixed parameters: monomer MW = 1636,  $\bar{V}$  = 0.793,  $d$  = 1.000,  $\epsilon_{230}$  = 950 M<sup>-1</sup>, and  $n$  = 6 or 8. A stoichiometry of an even number of subunits was assumed given the observed 1:1 stoichiometry of Acid-1F/Base-1F. Data fit with these parameters and the resulting residuals are shown in Figure SI-2.

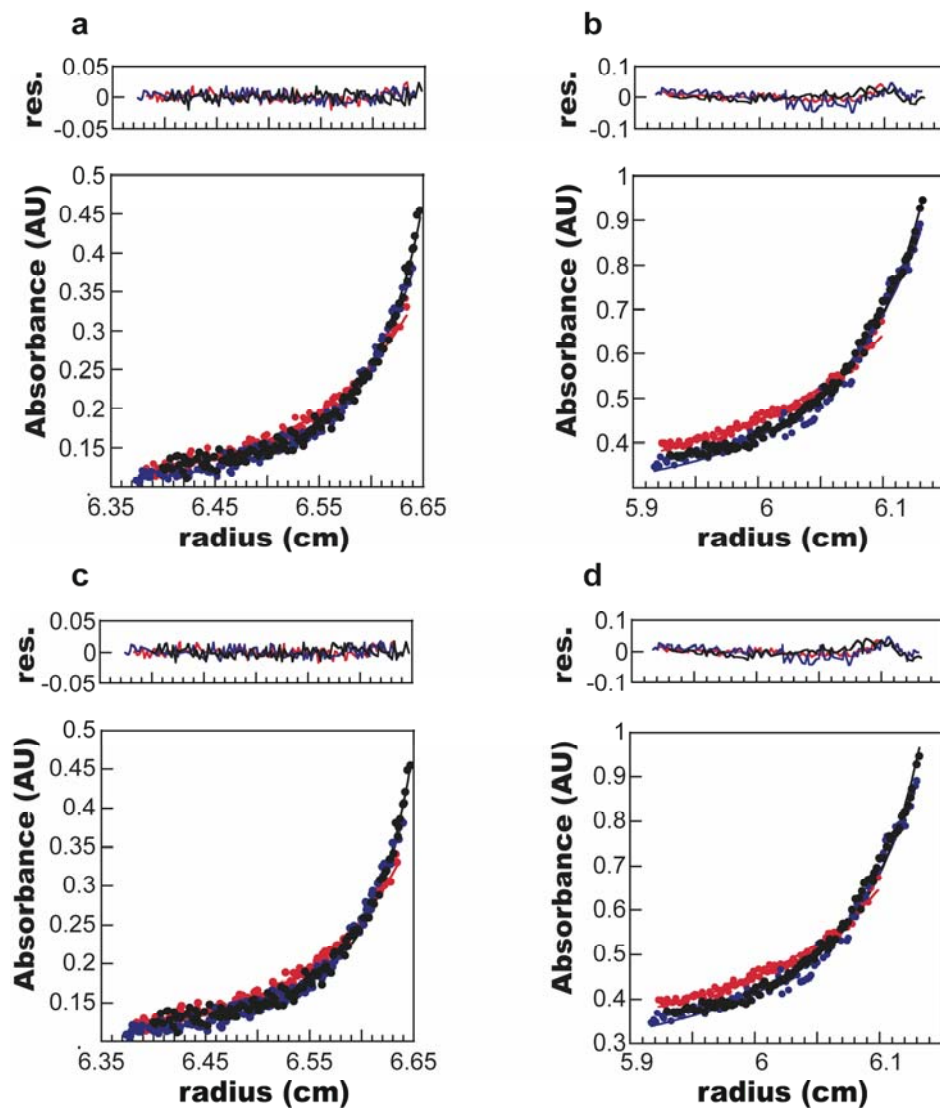

**Figure SI-2.** Sedimentation equilibrium analysis of Zwit-1F oligomerization. Samples containing (a and c) 100  $\mu\text{M}$  Zwit-1F monomer or (b and d) 250  $\mu\text{M}$  Zwit-1F monomer were prepared in PBC buffer (pH 7.1) and centrifuged to equilibrium at speeds of 42 (red), 50 (blue), or 60 krpm (black) and 25  $^{\circ}\text{C}$ . Experimental data are shown as points; lines indicate fits to (a and b) monomer-hexamer or (c and d) monomer-octamer models.

**Structure Determination.** Zwit-1F and Zwit-1F\* (1mM) crystallized by hanging drop vapour diffusion over 1.5M and 0.4M Na,K Tartrate, respectively. Crystals were soaked in a cryoprotectant of mother liquor containing 15% glycerol and X-ray diffraction data collected at

100K at the Cornell High Energy Synchrotron Source beamline A1 (0.946 Å) and the Yale Center for Structural Biology (1.54 Å) for Zwit-1F and Zwit-1F\*, respectively (See Table SI-1). Data processing and reduction were performed using HKL2000.<sup>3</sup> Heavy atom location, single-wavelength anomalous phasing and density modification were conducted using CNS.<sup>4</sup> Initial phases were calculated to 2.6 Å for Zwit-1F\* using single-wavelength anomalous diffraction techniques, giving a phasing power of 2.7 and figure of merit of 0.35, which improved to 0.83 following density modification. Electron density maps showed four unambiguous  $3_{14}$ -helices, which were built and refined in XFIT.<sup>5</sup> Following several rounds of refinement, the Zwit-1F\* model was used as a starting model for the refinement of Zwit-1F. After initial refinement of Zwit-1F in CNS was complete, the model was further refined with SHELX-97,<sup>6</sup> retaining an identical  $R_{\text{free}}$  set representing 10% of the data. Data were of sufficient resolution to apply anisotropic displacement parameters, as indicated by a 4% decrease in  $R_{\text{work}}$  and a 3.2% decrease in  $R_{\text{free}}$ . Due to the relatively high resolution of the structure, dual conformers for several residues could be resolved. The side chains of  $\text{R}^3$ -Orn3 in three monomers,  $\text{R}^3$ -Orn10 in one monomer and the “mainchain” (defined by conformation) of  $\text{R}^3$ -Asp12 in one monomer are modelled in two conformations. Figures were prepared using PyMol.<sup>7</sup>

**Table SI-1:** Data collection, phasing and refinement statistics (**SAS**)

|                                                         | Zwit-1F                          | Zwit-1F*                         |
|---------------------------------------------------------|----------------------------------|----------------------------------|
| <b>Data collection</b>                                  |                                  |                                  |
| Space group                                             | P4 <sub>1</sub> 2 <sub>1</sub> 2 | P4 <sub>1</sub> 2 <sub>1</sub> 2 |
| Cell dimensions                                         |                                  |                                  |
| <i>a</i> , <i>b</i> , <i>c</i> (Å)                      | 44.5, 44.5, 73.4                 | 43.9, 43.9, 73.7                 |
| $\alpha$ , $\beta$ , $\gamma$ (°)                       | 90, 90, 90                       | 90, 90, 90                       |
| Resolution (Å)                                          | 50-1.45 (1.5-1.45) <sup>a</sup>  | 100-2.45 (2.54-2.45)             |
| <i>R</i> <sub>sym</sub> or <i>R</i> <sub>merge</sub>    | 4.4 (46.0)                       | 10.7 (37.2)                      |
| <i>I</i> / $\sigma$ <i>I</i>                            | 43.5 (4.0)                       | 29.5 (6.0)                       |
| Completeness (%)                                        | 98.8 (92.7)                      | 99.9 (99.2)                      |
| Redundancy                                              | 10.3 (8.9)                       | 13.8 (9.3)                       |
| <b>Refinement</b>                                       |                                  |                                  |
| Resolution (Å)                                          | 50-1.45                          |                                  |
| No. reflections                                         | 13,619                           |                                  |
| <i>R</i> <sub>work</sub> / <i>R</i> <sub>free</sub> (%) | 14.2 / 19.2                      |                                  |
| No. atoms                                               |                                  |                                  |
| Protein                                                 | 487                              |                                  |
| Water                                                   | 94                               |                                  |
| B-factors                                               |                                  |                                  |
| Protein                                                 | 20.70                            |                                  |
| Water                                                   | 43.48                            |                                  |
| r.m.s deviations                                        |                                  |                                  |
| Bond lengths (Å)                                        | 0.011                            |                                  |
| Bond angles (°)                                         | 2.0                              |                                  |

<sup>a</sup>Highest resolution shell is shown in parenthesis

## References

- (1) Kritzer, J. A.; Tirado-Rives, J.; Hart, S. A.; Lear, J. D.; Jorgensen, W. L.; Schepartz, A. J. *Am. Chem. Soc.* **2005**, *127*, 167-178.
- (2) Durchschlag, H.; Zipper, P. *Prog. Colloid Polym. Sci.* **1994**, *94*, 20-39.
- (3) Otwinowski, Z.; Minor, W. *Methods Enzymol.* **1997**, *276*, 307-326.
- (4) Brunger, A. T.; Adams, P. D.; Clore, G. M.; DeLano, W. L.; Gros, P.; Grosse-Kunstleve, R. W.; Jiang, J. S.; Kuszewski, J.; Nilges, M.; Pannu, N. S.; Read, R. J.; Rice, L. M.; Simonson, T.; Warren, G. L. *Acta Crystallogr., Sect. D: Biol. Crystallogr.* **1998**, *54*, 905-921.
- (5) McRee, D. E. *J. Struct. Biol.* **1999**, *125*, 156-165.
- (6) Sheldrick, G. M.; Schneider, T. R. *Methods Enzymol.* **1997**, *277*, 319-343.
- (7) DeLano, W. *The PyMOL Molecular Graphics System* DeLano Scientific: San Carlos, 2002.
